# Supplementary material for: Antibiotic Use in Broiler Poultry Farms in Kathmandu Valley of Nepal: Which Antibiotics and Why?
Source: PubMed Central journal article supplement (PMC8167706; doi:10.3390/tropicalmed6020047), 2021-04-05
Supplement: tropicalmed-06-00047-s001.pdf [file tropicalmed-06-00047-s001.pdf]

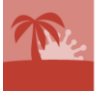

**Data collection form**

**Purpose:** Antibiotic use in broiler poultry farms of Kathmandu valley.

Poultry Farm Number: \_\_\_\_\_ Study district: \_\_\_\_\_ Location: \_\_\_\_\_

Poultry farm Name: \_\_\_\_\_ Date of Visit: \_\_\_\_\_

Name of poultry in charge interviewed: \_\_\_\_\_

Contact detail of in charge: \_\_\_\_\_

Name of interviewer: \_\_\_\_\_

**1. Type of antibiotics used (please tick one)**

| Antibiotics Name       | Yes | No |
|------------------------|-----|----|
| Tetracycline           |     |    |
| Neomycin               |     |    |
| Gentamycin             |     |    |
| Tylosin                |     |    |
| Sulphonamides          |     |    |
| Colistin sulphate      |     |    |
| Neomycin + Doxycycline |     |    |
| Ciprofloxacin          |     |    |
| Livofloxacin           |     |    |
| Amoxicillin +Colistin  |     |    |
| Other _____)           |     |    |

**2. Reason of use of antibiotic (please tick one)**

| Antibiotics Name       | Prophylatic | Treat disease | Other (specify |
|------------------------|-------------|---------------|----------------|
| Tetracycline           |             |               |                |
| Neomycin               |             |               |                |
| Gentamycin             |             |               |                |
| Tylosin                |             |               |                |
| Sulphonamides          |             |               |                |
| Colistin sulphate      |             |               |                |
| Neomycin + Doxycycline |             |               |                |
| Ciprofloxacin          |             |               |                |
| Livofloxacin           |             |               |                |
| Amoxicillin +Colistin  |             |               |                |
| Others _____)          |             |               |                |
| Others _____)          |             |               |                |
| Others _____)          |             |               |                |



---

**6. Withdrawal period**

a. farmer is aware of the withdrawal period

1. Yes                      2. No

b. If yes, number of days of withdrawal period prior to culling . \_\_\_\_\_  
(average number could be indicated)

**7. Purchase of Antibiotics**

---

- a. with prescription \_\_\_\_\_  
b. without prescription \_\_\_\_\_  
c. Both \_\_\_\_\_
-
